# Supplementary material
Source: PubMed Central journal article supplement (PMC9418358)
Supplement: Supp_DataS1.pdf [file Supp_DataS1.pdf]

## Assessment Instrument

1. How knowledgeable would you say you are on cannabis and cannabinoids?

- Not knowledgeable at all
- Slightly knowledgeable
- Moderately knowledgeable
- Very knowledgeable
- Extremely knowledgeable

2. How competent do you believe you are in identifying harmful and irresponsible use of cannabis medicinally?

- Not competent at all
- Slightly competent
- Moderately competent
- Very competent
- Extremely competent

3. How comfortable or uncomfortable do you feel integrating cannabis into your patient's treatment regimen?

- Very uncomfortable
- Somewhat uncomfortable
- Neither comfortable nor uncomfortable
- Somewhat comfortable
- Very comfortable

4. True or False: similar to the endogenous opioid system, there is an endogenous cannabinoid system in our bodies?

True

False

5. Is THC, CBD, or both responsible for the "high" of cannabis?

THC

CBD

Both

Unsure

6. What do you think is an effective dose of THC (in milligrams), if unsure please write in "unsure"

---

7. What do you think is an effective dose of CBD (in milligrams), if unsure please write in "unsure"

---

8. What do you think the percentage of THC is in..

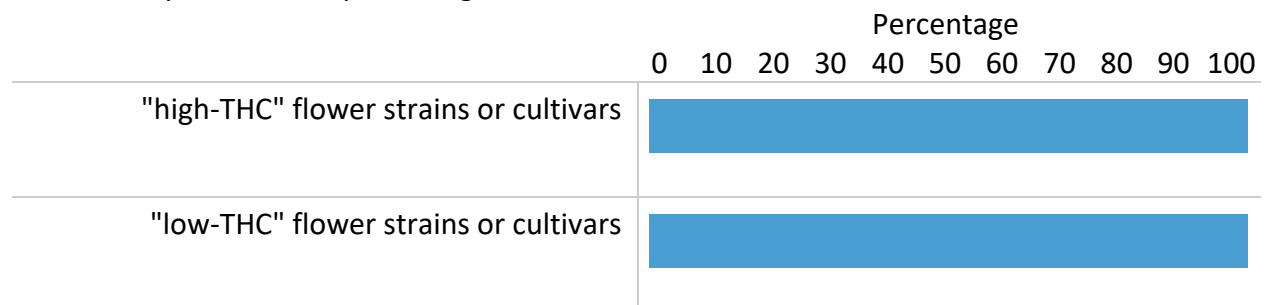

9. What do you think the percentage of CBD is in:

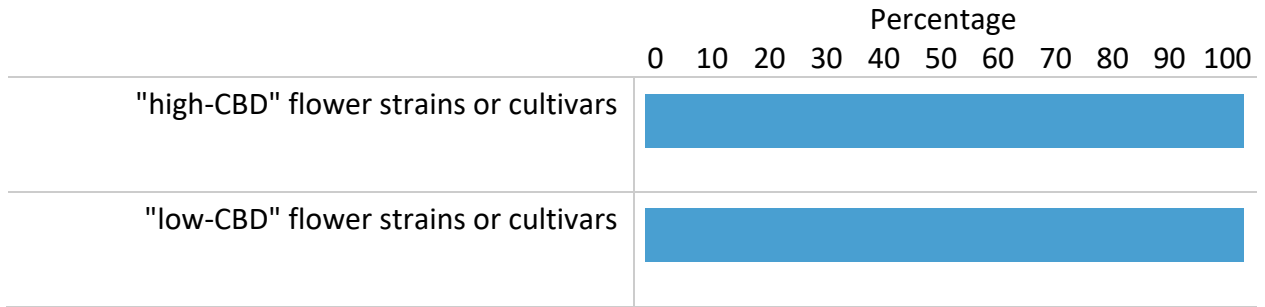

10. Which of the following conditions do you think cannabis is effective at treating? (check all that apply)

- Anorexia
- Cancer
- Chemotherapy induced nausea and vomiting
- Chronic pain
- Dementia
- Depressive symptoms secondary to chronic pain/MS
- Generalized Anxiety Disorder
- Glaucoma
- Irritable Bowel Syndrome
- Non-Chemotherapy related nausea and vomiting
- Sleep disturbance in individuals with chronic pain/MS
- Spasticity secondary to Multiple sclerosis
- Other \_\_\_\_\_
- None of the above
- Don't know

11. Which of the following conditions/events do you think cannabis use increases the risk for?  
(check all that apply)

- Death due to cannabis overdose
- Development of schizophrenia or other psychoses
- Lower birth weight baby when using during pregnancy
- Motor vehicle crashes
- Occupational accidents or injuries
- Post-traumatic stress disorder
- Other \_\_\_\_\_
- None of the above
- Don't know

12. Which of the following do you believe lowers risk of cannabis use?

- Adding a filter
- Avoid driving within 6 hours
- Avoid mixing with tobacco
- Avoid using while pregnant
- Ingestion rather than inhalation
- Using a bong/water pipe
- Using a concentrate (dab/wax) rather than raw plant
- Using ice in bong to reduce potency
- Using longer stemmed pipes
- Using strains that have a high CBD-THC ratio
- Using strains that have a high THC-CBD ratio
- Vaping rather than smoking
- Other \_\_\_\_\_
- None of the above
- Don't know

13. What education on cannabis or cannabinoids (if any) have you ever received? (select all that apply)

- CME
- Lecture
- Workshop
- Formal course
- Grand rounds
- I have done my own research
- None

14. How old are you in years? \_\_\_\_\_

15. How would you describe your gender?

- Man
- Woman
- Self-describe \_\_\_\_\_

16. Which department are you a part of?

\_\_\_\_\_

17. How many years have you been practicing medicine (including residency) \_\_\_\_\_

18. Do you have any comments on these topics?

## Answer Key

4. True or False: similar to the endogenous opioid system, there is an endogenous cannabinoid system in our bodies? **[TRUE]**

5. Is THC, CBD, or both responsible for the "high" of cannabis? **[THC]**

6. What do you think is an effective dose of THC (in milligrams), if unsure please write in "unsure" **[2-10mg]**

7. What do you think is an effective dose of CBD (in milligrams), if unsure please write in "unsure" **[2-10mg]**

8. What do you think the percentage of THC is in..

"high-THC" flower strains or cultivars **[10-35%]**

"low-THC" flower strains or cultivars **[0-4%]**

9. What do you think the percentage of CBD is in:

"high-CBD" flower strains or cultivars **[3-25%]**

"low-CBD" flower strains or cultivars **[0-2%]**

10. Which of the following conditions do you think cannabis is effective at treating? (check all that apply)

- |                |                                                       |
|----------------|-------------------------------------------------------|
| <b>[FALSE]</b> | Anorexia                                              |
| <b>[FALSE]</b> | Cancer                                                |
| <b>[TRUE]</b>  | Chemotherapy induced nausea and vomiting              |
| <b>[TRUE]</b>  | Chronic pain                                          |
| <b>[FALSE]</b> | Dementia                                              |
| <b>[TRUE]</b>  | Depressive symptoms secondary to chronic pain/MS      |
| <b>[FALSE]</b> | Generalized Anxiety Disorder                          |
| <b>[FALSE]</b> | Glaucoma                                              |
| <b>[FALSE]</b> | Irritable Bowel Syndrome                              |
| <b>[FALSE]</b> | Non-Chemotherapy related nausea and vomiting          |
| <b>[TRUE]</b>  | Sleep disturbance in individuals with chronic pain/MS |
| <b>[TRUE]</b>  | Spasticity secondary to Multiple sclerosis            |

11. Which of the following conditions/events do you think cannabis use increases the risk for?  
(check all that apply)

- [FALSE]** Death due to cannabis overdose
- [TRUE]** Development of schizophrenia or other psychoses
- [TRUE]** Lower birth weight baby when using during pregnancy
- [TRUE]** Motor vehicle crashes
- [FALSE]** Occupational accidents or injuries
- [FALSE]** Post-traumatic stress disorder

12. Which of the following do you believe lowers risk of cannabis use?

- [FALSE]** Adding a filter
- [TRUE]** Avoid driving within 6 hours
- [TRUE]** Avoid mixing with tobacco
- [TRUE]** Avoid using while pregnant
- [TRUE]** Ingestion rather than inhalation
- [FALSE]** Using a bong/water pipe
- [FALSE]** Using a concentrate (dab/wax) rather than raw plant
- [FALSE]** Using ice in bong to reduce potency
- [FALSE]** Using longer stemmed pipes
- [TRUE]** Using strains that have a high CBD-THC ratio
- [FALSE]** Using strains that have a high THC-CBD ratio
- [TRUE]** Vaping rather than smoking
